# Supplementary material for: Macrophages are recruited to hypoxic tumor areas and acquire a Pro-Angiogenic M2-Polarized phenotype via hypoxic cancer cell derived cytokines Oncostatin M and Eotaxin
Source: PubMed Central journal article supplement (PMC4170629; doi:10.18632/oncotarget.2110), 2014-06-17
Supplement: oncotarget-05-5350-s001.pdf [file oncotarget-05-5350-s001.pdf]

# Macrophages are recruited to hypoxic tumor areas and acquire a Pro-Angiogenic M2-Polarized phenotype via hypoxic cancer cell derived cytokines Oncostatin M and Eotaxin

## Supplemental Information

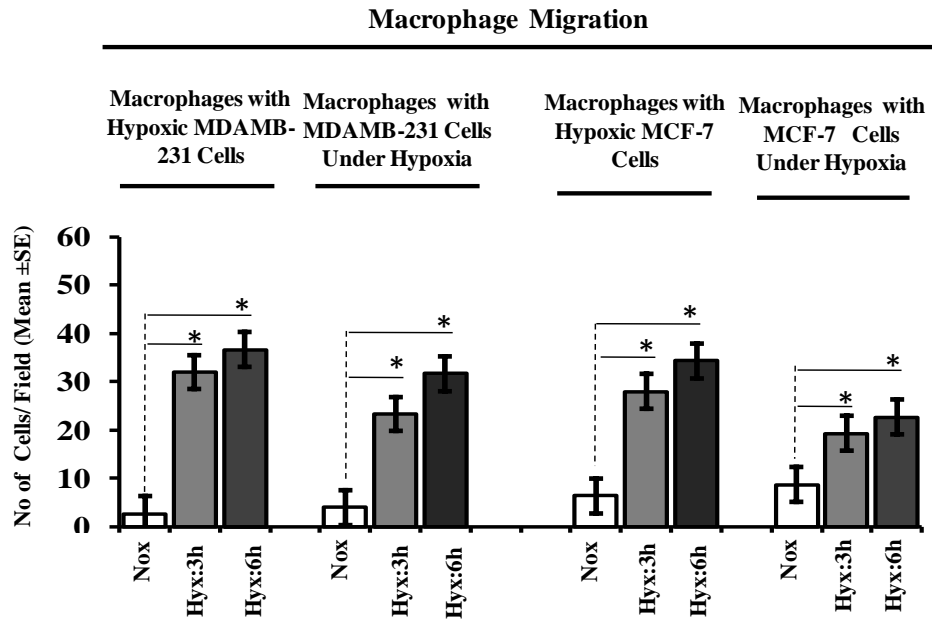

**Suppl.1: Comparison Chemotactic Data for Macrophage Co-Culture Hypoxic Cancer Cells Vs Macrophage/Cancer Cells Co-Culture Subject to Hypoxia**

## Suppl.2: RayBio Human Cytokine Antibody Array (5) MAP

|          | 1             | 2             | 3             | 4              | 5              | 6            | 7              | 8               |
|----------|---------------|---------------|---------------|----------------|----------------|--------------|----------------|-----------------|
| <b>A</b> | GRO- $\alpha$ | IL-10         | MIP-1 $\beta$ | Angiogenin     | Eotaxin-3      | IGFBP-2      | NT-3           | Pos             |
| <b>B</b> | GRO           | IL-8          | MIG           | IGF-1          | Eotaxin-2      | IGFBP-1      | NAP-2          | Pos             |
| <b>C</b> | GM-CSF        | IL-7          | MDC           | EGF            | Eotaxin        | HGF          | MIP-3 $\alpha$ | TIMP-2          |
| <b>D</b> | GCSF          | IL-6          | MCSF          | TNF- $\beta$   | Ck $\beta$ 8-1 | GDNF         | MIF            | TIMP-1          |
| <b>E</b> | ENA-78        | IL-5          | MCP-3         | TNF- $\alpha$  | BLC            | GCP-2        | MCP-4          | TGF- $\beta$ 3  |
| <b>F</b> | Neg           | IL-4          | MCP-2         | TGF- $\beta$ 1 | BDNF           | Fractalkine  | LIGHT          | TGF- $\beta$ 2  |
| <b>G</b> | Neg           | IL-3          | MCP-1         | TARC           | Leptin         | Flt-3 Ligand | LIF            | PIGF            |
| <b>H</b> | Pos           | IL-2          | IFN- $\gamma$ | SDF-1          | PDGF-BB        | FGF-9        | IP-10          | PARC            |
| <b>I</b> | Pos           | IL-1 $\beta$  | IL-15         | SCF            | VEGF           | FGF-7        | IL-16          | Osteoprotegerin |
| <b>J</b> | Pos           | IL-1 $\alpha$ | IL-13         | RANTES         | Thrombopoietin | FGF-6        | IGFBP-4        | Osteopontin     |
| <b>K</b> | Pos           | I-309         | IL-12p40p70   | MIP-1 $\delta$ | OncostatinM    | FGF-4        | IGFBP-3        | NT-4            |

| No. | MCF-7        | MDAMB-231     |
|-----|--------------|---------------|
| 1.  | OncostatinM  | OncostatinM   |
| 2.  | -            | RANTES        |
| 3.  | FGF-6        | -             |
| 4.  | VEGF         | VEGF          |
| 5.  | -            | IL-3          |
| 6.  | -            | MCP-1         |
| 7.  | -            | TAR-C         |
| 8.  | Eotaxin      | Eotaxin       |
| 9.  | TNF- $\beta$ | TNF- $\beta$  |
| 10. | Eotaxin-2    | -             |
| 11. | -            | MIP-1 $\beta$ |
| 12. | IL-10        | -             |
| 13. | -            | Leptin        |

**Suppl. 3: List of Human Cytokines Upregulated in Hypoxic Tumour Cell Conditioned Media in Comparison to Normoxic Tumour Cell Conditioned Media**

**Correlation between**

**HIF-1 $\alpha$  Vs Oncostatin M**

Total no. of field Evaluated: 74

|                          |       |          |       |         |
|--------------------------|-------|----------|-------|---------|
| Level of HIF 1- $\alpha$ | High: | Low /UD: |       |         |
|                          | 41    | 33       |       |         |
| Level of Oncostatin M    | High: | Low/UD:  | High: | Low/UD: |
|                          | 41    | 0        | 2     | 31      |

Chi square test with (yates corrected) Significant (p < .001) association between HIF-1 $\alpha$  and Oncostatin M

**Correlation between**

**Oncostatin M Vs CD206**

Total no. of field Evaluated: 60

|                       |       |          |       |         |
|-----------------------|-------|----------|-------|---------|
| Level of Oncostatin M | High: | Low /UD: |       |         |
|                       | 33    | 27       |       |         |
| Level of CD206        | High: | Low/UD:  | High: | Low/UD: |
|                       | 33    | 0        | 1     | 26      |

Chi square test with (yates corrected) Significant (p < .001) association between Oncostatin M and CD206

**Correlation between**

**HIF-1 $\alpha$  Vs Eotaxin**

Total no. of field Evaluated: 65

|                          |       |          |       |         |
|--------------------------|-------|----------|-------|---------|
| Level of HIF 1- $\alpha$ | High: | Low /UD: |       |         |
|                          | 36    | 29       |       |         |
| Level of Eotaxin         | High: | Low/UD:  | High: | Low/UD: |
|                          | 36    | 0        | 2     | 27      |

Chi square test with (yates corrected) Significant (p < .001) association between HIF-1 $\alpha$  and Eotaxin

**Correlation between**

**Eotaxin Vs CD206**

Total no. of field Evaluated: 54

|                  |       |          |       |         |
|------------------|-------|----------|-------|---------|
| Level of Eotaxin | High: | Low /UD: |       |         |
|                  | 31    | 23       |       |         |
| Level of CD206   | High: | Low/UD:  | High: | Low/UD: |
|                  | 29    | 2        | 1     | 22      |

Chi square test with (yates corrected) Significant (p < .001) association between Eotaxin and CD206

**Numbers represent fields showing presence of indicated antigen evaluated; UD =Undetectable level.**

**Suppl.4: Collective summary of Immunohistochemical Observations of all (14) the Human Breast Cancer Specimen**

**Patient wise correlation between**

**HIF-1 $\alpha$  Vs Oncostatin M**

| Patient No. 3  | Total no. of field Evaluated: 11 |       |          |       |         |
|----------------|----------------------------------|-------|----------|-------|---------|
|                | Level of HIF 1- $\alpha$         | High: | Low /UD: |       |         |
|                |                                  | 7     | 4        |       |         |
| Patient No. 25 | Total no. of field Evaluated:4   |       |          |       |         |
|                | Level of Oncostatin M            | High: | Low/UD:  | High: | Low/UD: |
|                |                                  | 7     | 0        | 0     | 4       |
| Patient No. 28 | Total no. of field Evaluated:5   |       |          |       |         |
|                | Level of HIF 1- $\alpha$         | High: | Low /UD: |       |         |
|                |                                  | 4     | 0        |       |         |
| Patient No. 41 | Total no. of field Evaluated:5   |       |          |       |         |
|                | Level of Oncostatin M            | High: | Low/UD:  | High: | Low/UD: |
|                |                                  | 2     | 0        | 0     | 3       |
| Patient No. 42 | Total no. of field Evaluated:5   |       |          |       |         |
|                | Level of HIF 1- $\alpha$         | High: | Low /UD: |       |         |
|                |                                  | 2     | 3        |       |         |
| Patient No. 3  | Total no. of field Evaluated:4   |       |          |       |         |
|                | Level of Oncostatin M            | High: | Low/UD:  | High: | Low/UD: |
|                |                                  | 2     | 0        | 0     | 2       |

**Patient wise correlation between**

**Oncostatin M Vs CD206**

| Patient No. 3  | Total no. of field Evaluated: 11 |       |          |       |         |
|----------------|----------------------------------|-------|----------|-------|---------|
|                | Level of Oncostatin M            | High: | Low /UD: |       |         |
|                |                                  | 7     | 4        |       |         |
| Patient No. 25 | Total no. of field Evaluated:3   |       |          |       |         |
|                | Level of CD206                   | High: | Low/UD:  | High: | Low/UD: |
|                |                                  | 7     | 0        | 0     | 4       |
| Patient No. 28 | Total no. of field Evaluated:5   |       |          |       |         |
|                | Level of Oncostatin M            | High: | Low /UD: |       |         |
|                |                                  | 5     | 0        |       |         |
| Patient No. 41 | Total no. of field Evaluated:5   |       |          |       |         |
|                | Level of CD206                   | High: | Low/UD:  | High: | Low/UD: |
|                |                                  | 5     | 0        | 0     | 0       |
| Patient No. 41 | Total no. of field Evaluated:5   |       |          |       |         |
|                | Level of Oncostatin M            | High: | Low /UD: |       |         |
|                |                                  | 3     | 2        |       |         |
| Patient No. 42 | Total no. of field Evaluated:5   |       |          |       |         |
|                | Level of CD206                   | High: | Low/UD:  | High: | Low/UD: |
|                |                                  | 3     | 0        | 0     | 2       |
| Patient No. 3  | Total no. of field Evaluated:11  |       |          |       |         |
|                | Level of Oncostatin M            | High: | Low /UD: |       |         |
|                |                                  | 7     | 4        |       |         |
| Patient No. 25 | Total no. of field Evaluated:3   |       |          |       |         |
|                | Level of Oncostatin M            | High: | Low /UD: |       |         |
|                |                                  | 2     | 1        |       |         |
| Patient No. 28 | Total no. of field Evaluated:5   |       |          |       |         |
|                | Level of Oncostatin M            | High: | Low /UD: |       |         |
|                |                                  | 2     | 0        |       |         |
| Patient No. 41 | Total no. of field Evaluated:5   |       |          |       |         |
|                | Level of Oncostatin M            | High: | Low /UD: |       |         |
|                |                                  | 2     | 3        |       |         |
| Patient No. 42 | Total no. of field Evaluated:5   |       |          |       |         |
|                | Level of Oncostatin M            | High: | Low /UD: |       |         |
|                |                                  | 2     | 3        |       |         |

Total no. of field Evaluated:5

|               |                                 |       |         |          |         |
|---------------|---------------------------------|-------|---------|----------|---------|
| Patient No.43 | Level of HIF 1- $\alpha$        | High: |         | Low /UD: |         |
|               |                                 | 2     |         | 3        |         |
|               | Level of Oncostatin M           | High: | Low/UD: | High:    | Low/UD: |
|               |                                 | 2     | 0       | 0        | 3       |
|               | Total no. of field Evaluated:10 |       |         |          |         |

Total no. of field Evaluated:10

|                |                                |       |         |          |         |
|----------------|--------------------------------|-------|---------|----------|---------|
| Patient No. 46 | Level of HIF 1- $\alpha$       | High: |         | Low /UD: |         |
|                |                                | 7     |         | 3        |         |
|                | Level of Oncostatin M          | High: | Low/UD: | High:    | Low/UD: |
|                |                                | 7     | 0       | 0        | 3       |
|                | Total no. of field Evaluated:2 |       |         |          |         |

Total no. of field Evaluated:2

|                |                                  |       |         |          |         |
|----------------|----------------------------------|-------|---------|----------|---------|
| Patient No. 47 | Level of HIF 1- $\alpha$         | High: |         | Low /UD: |         |
|                |                                  | 1     |         | 1        |         |
|                | Level of Oncostatin M            | High: | Low/UD: | High:    | Low/UD: |
|                |                                  | 1     | 0       | 0        | 1       |
|                | Total no. of field Evaluated: 10 |       |         |          |         |

Total no. of field Evaluated:10

|                |                                |       |         |          |         |
|----------------|--------------------------------|-------|---------|----------|---------|
| Patient No. 51 | Level of HIF 1- $\alpha$       | High: |         | Low /UD: |         |
|                |                                | 6     |         | 4        |         |
|                | Level of Oncostatin M          | High: | Low/UD: | High:    | Low/UD: |
|                |                                | 6     | 0       | 0        | 4       |
|                | Total no. of field Evaluated:2 |       |         |          |         |

Total no. of field Evaluated:2

|                |                                |       |         |          |         |
|----------------|--------------------------------|-------|---------|----------|---------|
| Patient No. 52 | Level of HIF 1- $\alpha$       | High: |         | Low /UD: |         |
|                |                                | 1     |         | 1        |         |
|                | Level of Oncostatin M          | High: | Low/UD: | High:    | Low/UD: |
|                |                                | 1     | 0       | 0        | 1       |
|                | Total no. of field Evaluated:4 |       |         |          |         |

Total no. of field Evaluated:4

|                |                          |       |  |          |  |
|----------------|--------------------------|-------|--|----------|--|
| Patient No. 56 | Level of HIF 1- $\alpha$ | High: |  | Low /UD: |  |
|                |                          | 3     |  | 1        |  |

Total no. of field Evaluated:4

|                |                                |       |         |          |         |
|----------------|--------------------------------|-------|---------|----------|---------|
| Patient No. 43 | Level of Oncostatin M          | High: |         | Low /UD: |         |
|                |                                | 1     |         | 3        |         |
|                | Level of CD206                 | High: | Low/UD: | High:    | Low/UD: |
|                |                                | 1     | 0       | 0        | 3       |
|                | Total no. of field Evaluated:3 |       |         |          |         |

Total no. of field Evaluated:3

|                |                                |       |         |          |         |
|----------------|--------------------------------|-------|---------|----------|---------|
| Patient No. 46 | Level of Oncostatin M          | High: |         | Low /UD: |         |
|                |                                | 1     |         | 2        |         |
|                | Level of CD206                 | High: | Low/UD: | High:    | Low/UD: |
|                |                                | 1     | 0       | 1        | 1       |
|                | Total no. of field Evaluated:3 |       |         |          |         |

Total no. of field Evaluated:3

|                |                                 |       |         |          |         |
|----------------|---------------------------------|-------|---------|----------|---------|
| Patient No. 47 | Level of Oncostatin M           | High: |         | Low /UD: |         |
|                |                                 | 1     |         | 2        |         |
|                | Level of CD206                  | High: | Low/UD: | High:    | Low/UD: |
|                |                                 | 1     | 0       | 0        | 2       |
|                | Total no. of field Evaluated: 3 |       |         |          |         |

Total no. of field Evaluated:3

|                |                                |       |         |          |         |
|----------------|--------------------------------|-------|---------|----------|---------|
| Patient No. 51 | Level of Oncostatin M          | High: |         | Low /UD: |         |
|                |                                | 2     |         | 1        |         |
|                | Level of CD206                 | High: | Low/UD: | High:    | Low/UD: |
|                |                                | 2     | 0       | 0        | 1       |
|                | Total no. of field Evaluated:2 |       |         |          |         |

Total no. of field Evaluated:2

|                |                                |       |         |          |         |
|----------------|--------------------------------|-------|---------|----------|---------|
| Patient No. 52 | Level of Oncostatin M          | High: |         | Low /UD: |         |
|                |                                | 1     |         | 1        |         |
|                | Level of CD206                 | High: | Low/UD: | High:    | Low/UD: |
|                |                                | 1     | 0       | 0        | 1       |
|                | Total no. of field Evaluated:5 |       |         |          |         |

Total no. of field Evaluated:5

|                |                       |       |  |          |  |
|----------------|-----------------------|-------|--|----------|--|
| Patient No. 56 | Level of Oncostatin M | High: |  | Low /UD: |  |
|                |                       | 2     |  | 3        |  |

|                       |                                |         |            |         |           |
|-----------------------|--------------------------------|---------|------------|---------|-----------|
| <b>Patient No. 57</b> | Level of Oncostatin M          | High: 3 | Low/UD: 0  | High: 0 | Low/UD: 1 |
|                       | Total no. of field Evaluated:6 |         |            |         |           |
|                       | Level of HIF 1- $\alpha$       | High: 3 | Low /UD: 3 |         |           |
| <b>Patient No. 59</b> | Level of Oncostatin M          | High: 3 | Low/UD: 0  | High: 1 | Low/UD: 2 |
|                       | Total no. of field Evaluated:3 |         |            |         |           |
|                       | Level of HIF 1- $\alpha$       | High: 1 | Low /UD: 2 |         |           |
| <b>Patient No. 60</b> | Level of Oncostatin M          | High: 1 | Low/UD: 0  | High: 0 | Low/UD: 2 |
|                       | Total no. of field Evaluated:3 |         |            |         |           |
|                       | Level of HIF 1- $\alpha$       | High: 0 | Low /UD: 3 |         |           |
| <b>Patient No. 60</b> | Level of Oncostatin M          | High: 0 | Low/UD: 0  | High: 0 | Low/UD: 3 |

|                       |                                |         |            |         |           |
|-----------------------|--------------------------------|---------|------------|---------|-----------|
| <b>Patient No. 57</b> | Level of CD206                 | High: 2 | Low/UD: 0  | High: 0 | Low/UD: 3 |
|                       | Total no. of field Evaluated:6 |         |            |         |           |
|                       | Level of Oncostatin M          | High: 2 | Low /UD: 4 |         |           |
| <b>Patient No. 59</b> | Level of CD206                 | High: 2 | Low/UD: 0  | High: 0 | Low/UD: 4 |
|                       | Total no. of field Evaluated:3 |         |            |         |           |
|                       | Level of Oncostatin M          | High: 2 | Low /UD: 1 |         |           |
| <b>Patient No. 60</b> | Level of CD206                 | High: 2 | Low/UD: 0  | High: 0 | Low/UD: 1 |
|                       | Total no. of field Evaluated:2 |         |            |         |           |
|                       | Level of Oncostatin M          | High: 0 | Low /UD: 2 |         |           |
| <b>Patient No. 60</b> | Level of CD206                 | High: 0 | Low/UD: 0  | High: 0 | Low/UD: 2 |

**Patient wise correlation between HIF-1 $\alpha$  Vs Eotaxin**

**Patient wise correlation between Eotaxin Vs CD206**

|                       |                                 |         |            |         |           |
|-----------------------|---------------------------------|---------|------------|---------|-----------|
| <b>Patient No. 3</b>  | Total no. of field Evaluated: 6 |         |            |         |           |
|                       | Level of HIF 1- $\alpha$        | High: 4 | Low /UD: 2 |         |           |
|                       | Level of Eotaxin                | High: 4 | Low/UD: 0  | High: 0 | Low/UD: 2 |
| <b>Patient No. 25</b> | Total no. of field Evaluated:5  |         |            |         |           |
|                       | Level of HIF 1- $\alpha$        | High: 3 | Low /UD: 2 |         |           |

|                       |                                 |         |            |         |           |
|-----------------------|---------------------------------|---------|------------|---------|-----------|
| <b>Patient No. 3</b>  | Total no. of field Evaluated: 3 |         |            |         |           |
|                       | Level of Eotaxin                | High: 2 | Low /UD: 1 |         |           |
|                       | Level of CD206                  | High: 2 | Low/UD: 0  | High: 0 | Low/UD: 1 |
| <b>Patient No. 25</b> | Total no. of field Evaluated:4  |         |            |         |           |
|                       | Level of Eotaxin                | High: 2 | Low /UD: 2 |         |           |

|                |                                |         |            |         |           |
|----------------|--------------------------------|---------|------------|---------|-----------|
| Patient No. 28 | Level of Eotaxin               | High: 3 | Low/UD: 0  | High: 0 | Low/UD: 2 |
|                | Total no. of field Evaluated:5 |         |            |         |           |
| Patient No. 41 | Level of HIF 1- $\alpha$       | High: 2 | Low /UD: 3 |         |           |
|                | Level of Eotaxin               | High: 2 | Low/UD: 0  | High: 0 | Low/UD: 3 |
| Patient No. 42 | Level of HIF 1- $\alpha$       | High: 3 | Low /UD: 3 |         |           |
|                | Level of Eotaxin               | High: 3 | Low/UD: 0  | High: 0 | Low/UD: 3 |
| Patient No. 43 | Level of HIF 1- $\alpha$       | High: 3 | Low /UD: 3 |         |           |
|                | Level of Eotaxin               | High: 3 | Low/UD: 0  | High: 1 | Low/UD: 2 |
| Patient No. 46 | Level of HIF 1- $\alpha$       | High: 4 | Low /UD: 0 |         |           |
|                | Level of Eotaxin               | High: 4 | Low/UD: 0  | High: 0 | Low/UD: 0 |

|                |                                |         |            |         |           |
|----------------|--------------------------------|---------|------------|---------|-----------|
| Patient No. 28 | Level of CD206                 | High: 2 | Low/UD: 0  | High: 0 | Low/UD: 2 |
|                | Total no. of field Evaluated:5 |         |            |         |           |
| Patient No. 41 | Level of Eotaxin               | High: 3 | Low /UD: 2 |         |           |
|                | Level of CD206                 | High: 3 | Low/UD: 0  | High: 0 | Low/UD: 2 |
| Patient No. 42 | Level of Eotaxin               | High: 2 | Low /UD: 1 |         |           |
|                | Level of CD206                 | High: 2 | Low/UD: 0  | High: 0 | Low/UD: 2 |
| Patient No. 43 | Level of Eotaxin               | High: 2 | Low /UD: 2 |         |           |
|                | Level of CD206                 | High: 1 | Low/UD: 1  | High: 0 | Low/UD: 1 |
| Patient No. 46 | Level of Eotaxin               | High: 2 | Low /UD: 1 |         |           |
|                | Level of CD206                 | High: 2 | Low/UD: 0  | High: 0 | Low/UD: 2 |



**Patient No. 51**

|                                 |       |          |                 |
|---------------------------------|-------|----------|-----------------|
| Level of HIF 1- $\alpha$        | High: | Low /UD: |                 |
|                                 | 2     | 2        |                 |
| Level of Eotaxin                | High: | Low/UD:  | High:   Low/UD: |
|                                 | 2     | 0        | 1   1           |
| Total no. of field Evaluated: 5 |       |          |                 |

|                                |       |          |                 |
|--------------------------------|-------|----------|-----------------|
| Level of HIF 1- $\alpha$       | High: | Low /UD: |                 |
|                                | 3     | 2        |                 |
| Level of Eotaxin               | High: | Low/UD:  | High:   Low/UD: |
|                                | 3     | 0        | 0   2           |
| Total no. of field Evaluated:4 |       |          |                 |

**Patient No. 52**

|                                |       |          |                 |
|--------------------------------|-------|----------|-----------------|
| Level of HIF 1- $\alpha$       | High: | Low /UD: |                 |
|                                | 1     | 3        |                 |
| Level of Eotaxin               | High: | Low/UD:  | High:   Low/UD: |
|                                | 1     | 0        | 0   3           |
| Total no. of field Evaluated:4 |       |          |                 |

**Patient No. 56**

|                                |       |          |                 |
|--------------------------------|-------|----------|-----------------|
| Level of HIF 1- $\alpha$       | High: | Low /UD: |                 |
|                                | 3     | 1        |                 |
| Level of Eotaxin               | High: | Low/UD:  | High:   Low/UD: |
|                                | 3     | 0        | 0   1           |
| Total no. of field Evaluated:5 |       |          |                 |

**Patient No. 57**

|                                |       |          |                 |
|--------------------------------|-------|----------|-----------------|
| Level of HIF 1- $\alpha$       | High: | Low /UD: |                 |
|                                | 2     | 3        |                 |
| Level of Eotaxin               | High: | Low/UD:  | High:   Low/UD: |
|                                | 2     | 0        | 0   3           |
| Total no. of field Evaluated:5 |       |          |                 |

**Patient No. 59**

|                          |       |          |                 |
|--------------------------|-------|----------|-----------------|
| Level of HIF 1- $\alpha$ | High: | Low /UD: |                 |
|                          | 2     | 3        |                 |
| Level of Eotaxin         | High: | Low/UD:  | High:   Low/UD: |
|                          |       |          |                 |

**Patient No. 51**

|                                 |       |          |                 |
|---------------------------------|-------|----------|-----------------|
| Level of Eotaxin                | High: | Low /UD: |                 |
|                                 | 2     | 1        |                 |
| Level of CD206                  | High: | Low/UD:  | High:   Low/UD: |
|                                 | 2     | 0        | 0   1           |
| Total no. of field Evaluated: 5 |       |          |                 |

|                                |       |          |                 |
|--------------------------------|-------|----------|-----------------|
| Level of Eotaxin               | High: | Low /UD: |                 |
|                                | 3     | 2        |                 |
| Level of CD206                 | High: | Low/UD:  | High:   Low/UD: |
|                                | 3     | 0        | 0   2           |
| Total no. of field Evaluated:5 |       |          |                 |

**Patient No. 52**

|                                |       |          |                 |
|--------------------------------|-------|----------|-----------------|
| Level of Eotaxin               | High: | Low /UD: |                 |
|                                | 2     | 3        |                 |
| Level of CD206                 | High: | Low/UD:  | High:   Low/UD: |
|                                | 2     | 0        | 0   3           |
| Total no. of field Evaluated:3 |       |          |                 |

**Patient No. 56**

|                                |       |          |                 |
|--------------------------------|-------|----------|-----------------|
| Level of Eotaxin               | High: | Low /UD: |                 |
|                                | 2     | 1        |                 |
| Level of CD206                 | High: | Low/UD:  | High:   Low/UD: |
|                                | 2     | 0        | 0   1           |
| Total no. of field Evaluated:4 |       |          |                 |

**Patient No. 57**

|                                |       |          |                 |
|--------------------------------|-------|----------|-----------------|
| Level of Eotaxin               | High: | Low /UD: |                 |
|                                | 3     | 1        |                 |
| Level of CD206                 | High: | Low/UD:  | High:   Low/UD: |
|                                | 2     | 1        | 0   1           |
| Total no. of field Evaluated:4 |       |          |                 |

**Patient No. 59**

|                  |       |          |                 |
|------------------|-------|----------|-----------------|
| Level of Eotaxin | High: | Low /UD: |                 |
|                  | 2     | 2        |                 |
| Level of CD206   | High: | Low/UD:  | High:   Low/UD: |
|                  |       |          |                 |

|                       |                          |                                |         |          |         |                       |                |                                |         |       |          |   |
|-----------------------|--------------------------|--------------------------------|---------|----------|---------|-----------------------|----------------|--------------------------------|---------|-------|----------|---|
| <b>Patient No. 60</b> |                          | 2                              | 0       | 0        | 3       | <b>Patient No. 60</b> |                | 2                              | 0       | 0     | 2        |   |
|                       |                          | Total no. of field Evaluated:3 |         |          |         |                       |                | Total no. of field Evaluated:4 |         |       |          |   |
|                       | Level of HIF 1- $\alpha$ | High:                          |         | Low /UD: |         |                       |                | Level of Eotaxin               | High:   |       | Low /UD: |   |
|                       |                          | 2                              |         |          | 1       |                       |                |                                | 2       |       |          | 2 |
|                       | Level of Eotaxin         | High:                          | Low/UD: | High:    | Low/UD: |                       | Level of CD206 | High:                          | Low/UD: | High: | Low/UD:  |   |
|                       |                          | 2                              | 0       | 0        | 1       |                       |                | 2                              | 0       | 0     | 2        |   |

Numbers represent fields showing presence of indicated antigen evaluated; UD =Undetectable level.

**Suppl. 5: Summary of Immunohistochemical Observations of Individual Human Breast Cancer Specimen**

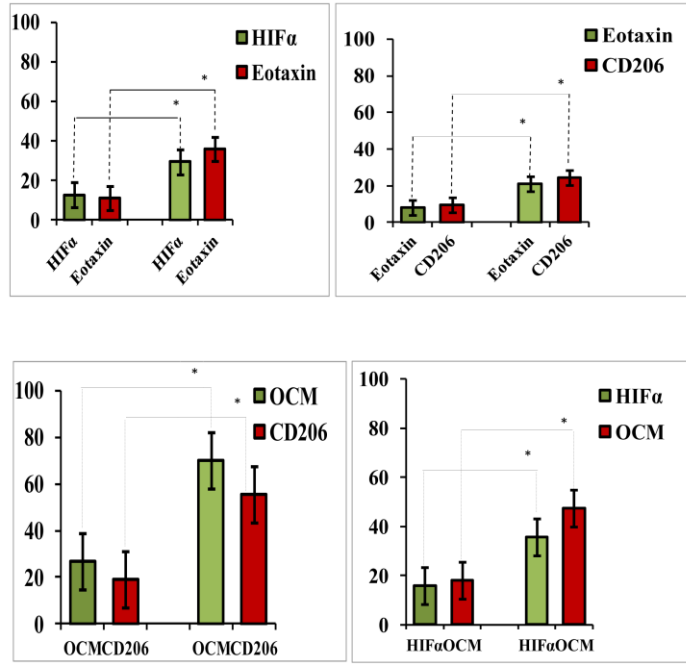

Each bar represents the mean intensity of five different fields.

**Suppl.6: Quantification of Oncostatin M/Eotaxin and CD206 Expression (Florescence intensity) in Hypoxic (HIF-1α Positive) area of Human Breast Cancer Specimen**

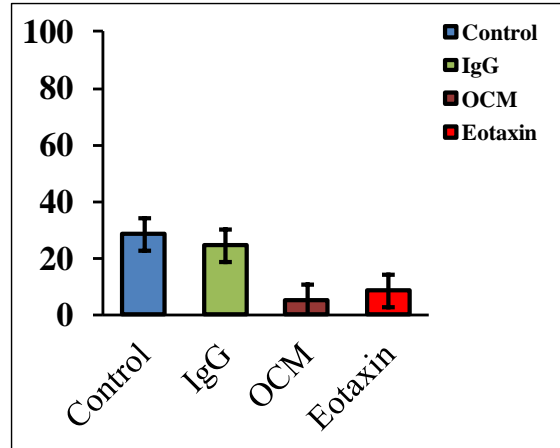

Each bar represents the mean intensity of five different fields.

**Suppl.7: Quantification of CD31 Expression (Florescence intensity) in 4T1/BALB/c Tumour Tissue**

(A) Mc-I-1 (B) CD16 Expression

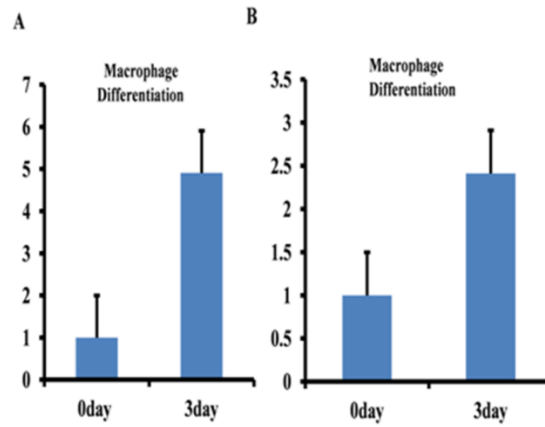

**Suppl. 8: Real-Time Quantitative PCR of Macrophage Specific Markers in THP-1 Derived Macrophages**
